# Supplementary material for: Synthesis of niobium-doped titanate nanotubes as solid acid catalysts
Source: Royal Society of Chemistry journal article supplement (doi:10.1039/c6cy00044d), 2016-01-01
Supplement: c6cy00044d1.pdf [file c6cy00044d1.pdf]

## SUPPLEMENTARY INFORMATION

### Synthesis of Niobium-doped Titanate Nanotubes as Solid Acid Catalysts

Emiko Wada, Masaaki Kitano, Kazuto Yamamoto, Kiyotaka Nakajima, Shigenobu Hayashi, and Michikazu Hara\*

**Table S1** Nb contents of Nb-TiO<sub>2</sub> and Nb-TiNTs measured by ICP and XPS.

| Catalyst                 | Nb/Ti ratio (%) |     |
|--------------------------|-----------------|-----|
|                          | ICP             | XPS |
| Nb(1%)-TiO <sub>2</sub>  | 0.8             | 1.6 |
| Nb(1%)-TiNT              | 0.9             | 1.7 |
| Nb(5%)-TiO <sub>2</sub>  | 4.7             | 9.2 |
| Nb(5%)-TiNT              | 4.9             | 10  |
| Nb(10%)-TiO <sub>2</sub> | 11              | 20  |
| Nb(10%)-TiNT             | 10              | 25  |

**Table S2** Surface area and pore volume of various titanate materials.

| Catalyst     | Surface area<br>(m <sup>2</sup> g <sup>-1</sup> ) | Total pore<br>volume<br>(cm <sup>3</sup> g <sup>-1</sup> ) |
|--------------|---------------------------------------------------|------------------------------------------------------------|
| TiNT         | 350                                               | 0.63                                                       |
| Nb(1%)-TiNT  | 388                                               | 0.87                                                       |
| Nb(3%)-TiNT  | 423                                               | 0.40                                                       |
| Nb(5%)-TiNT  | 431                                               | 0.60                                                       |
| Nb(7%)-TiNT  | 457                                               | 0.58                                                       |
| Nb(10%)-TiNT | 438                                               | 0.50                                                       |

**Table S3** The catalytic performance of Nb-based catalysts for the alkylation of aromatics with benzyl alcohol.

| Catalyst                                                                                 | Substrate      | Reaction temperature (K)        | Time (h) | Yield (%)  | Ref.             |
|------------------------------------------------------------------------------------------|----------------|---------------------------------|----------|------------|------------------|
| <b>Nb(5%)-TiNT</b>                                                                       | <b>toluene</b> | <b>373</b>                      | <b>6</b> | <b>100</b> | <b>This work</b> |
| Nb <sub>2</sub> O <sub>5</sub> ·nH <sub>2</sub> O                                        | anisole        | Reflux temperature <sup>a</sup> | 9        | 37.6       | S1               |
| Nb <sub>2</sub> O <sub>5</sub> ·nH <sub>2</sub> O                                        | toluene        | Reflux temperature <sup>b</sup> | 9        | 3.3        | S1               |
| H <sub>3</sub> PO <sub>4</sub> treated Nb <sub>2</sub> O <sub>5</sub> ·nH <sub>2</sub> O | anisole        | Reflux temperature <sup>a</sup> | 9        | 85.2       | S1               |
| H <sub>3</sub> PO <sub>4</sub> treated Nb <sub>2</sub> O <sub>5</sub> ·nH <sub>2</sub> O | toluene        | Reflux temperature <sup>b</sup> | 9        | 31.8       | S1               |
| Mesoporous Nb-oxide                                                                      | anisole        | Reflux temperature <sup>a</sup> | 9        | 80         | S2               |
| Sulfated Mesoporous Nb-oxide                                                             | anisole        | Reflux temperature <sup>a</sup> | 0.5      | 100        | S2               |
| Nb <sub>2</sub> O <sub>5</sub> /Al <sub>2</sub> O <sub>3</sub>                           | anisole        | 413                             | 3        | 50         | S3               |
| Layered niobium oxide                                                                    | anisole        | 373                             | 2        | 36.4       | S4               |
| HTiNbO <sub>5</sub> nanosheets                                                           | anisole        | 373                             | 2        | 0          | S5               |
| HNb <sub>3</sub> O <sub>8</sub> nanosheets                                               | anisole        | 373                             | 2        | 1.8        | S5               |

<sup>a</sup>The temperature would be higher than 423 K because the boiling temperature of anisole and benzyl alcohol is 426.8 K and 478 K, respectively.

<sup>b</sup>The temperature would be higher than 383 K because the boiling temperature of toluene is 383.6 K.

**Table S4** Acid amount of Nb-TiNT.

| Catalyst     | Acid amount (mmol g <sup>-1</sup> ) |       |
|--------------|-------------------------------------|-------|
|              | Brønsted                            | Lewis |
| TiNT         | 0.21                                | 0.27  |
| Nb(1%)-TiNT  | 0.21                                | 0.21  |
| Nb(5%)-TiNT  | 0.22                                | 0.23  |
| Nb(10%)-TiNT | 0.22                                | 0.27  |

**Table S5** Relative ratios for various acid sites observed in Fig. 9.

| Catalyst     | Relative ratio (%) |       |        |        |
|--------------|--------------------|-------|--------|--------|
|              | 56 ppm             | 61ppm | 65 ppm | 70 ppm |
| TiNT         | 21.2               | 35.2  | 27.7   | 15.8   |
| Nb(1%)-TiNT  | 18.9               | 33.8  | 28.4   | 18.9   |
| Nb(3%)-TiNT  | 11.4               | 38.1  | 31.1   | 19.4   |
| Nb(5%)-TiNT  | 16.8               | 31.4  | 31.4   | 20.5   |
| Nb(7%)-TiNT  | 16.1               | 32.8  | 29.5   | 21.6   |
| Nb(10%)-TiNT | 18.0               | 31.5  | 30.3   | 20.2   |

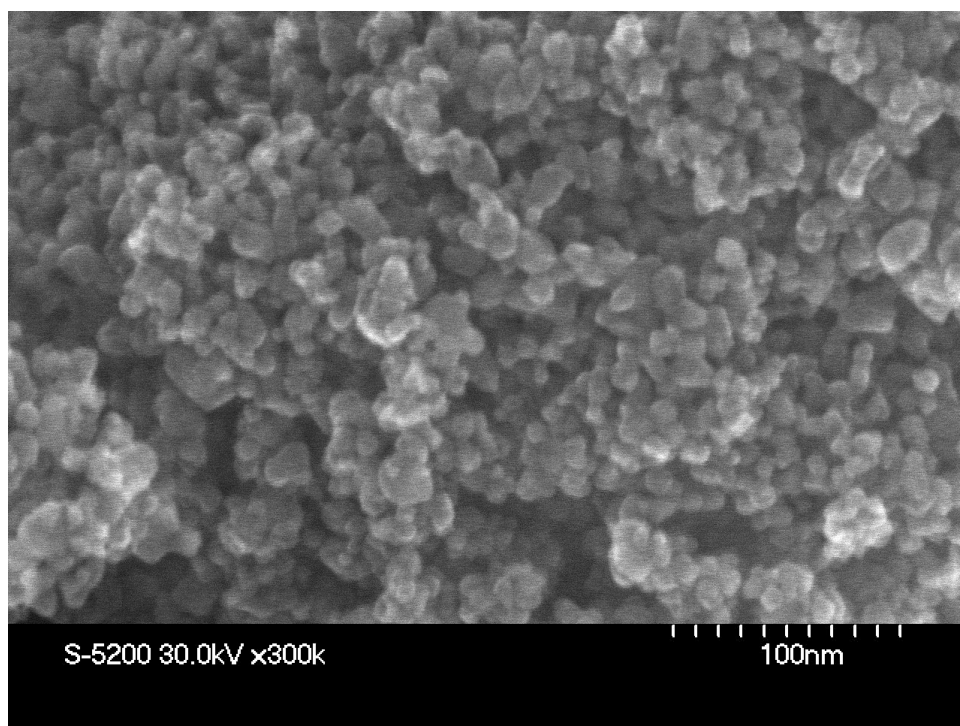

**Figure S1** SEM image of Nb(5%)-TiO<sub>2</sub>.

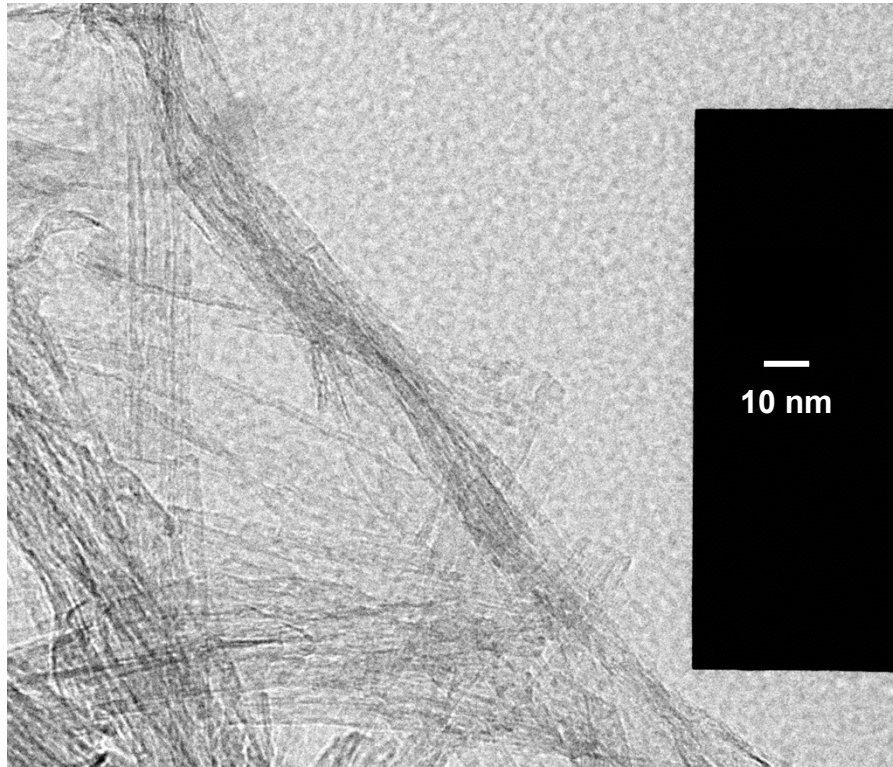

**Figure S2** TEM image of Nb(5%)-TiNT.

a)

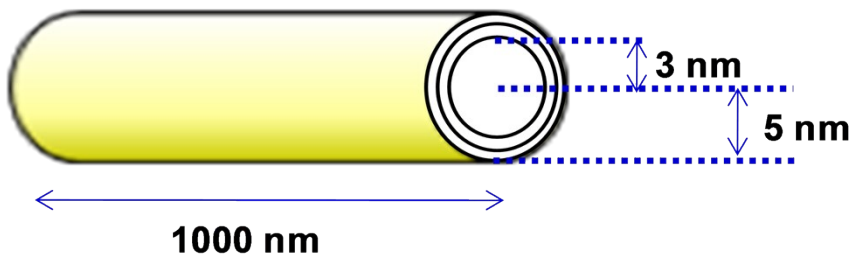

b)

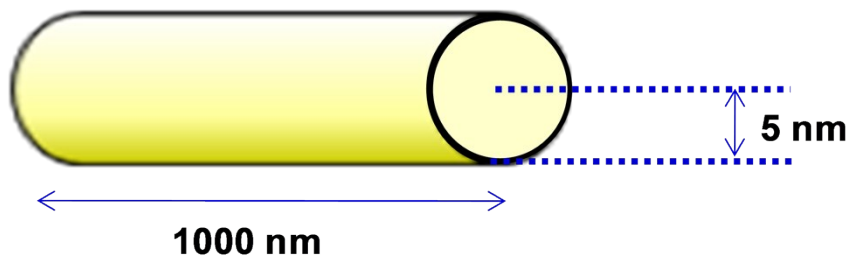

**Figure S3** Schematic showing an ideal a) nanotube and b) nanorod model.

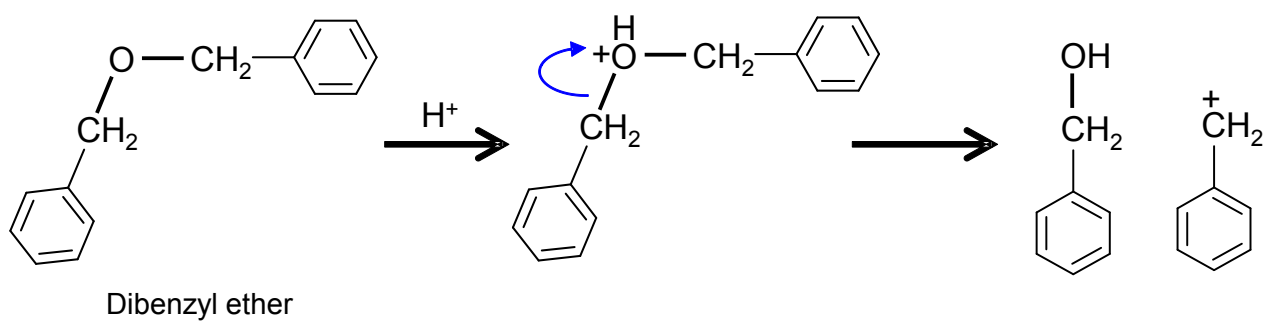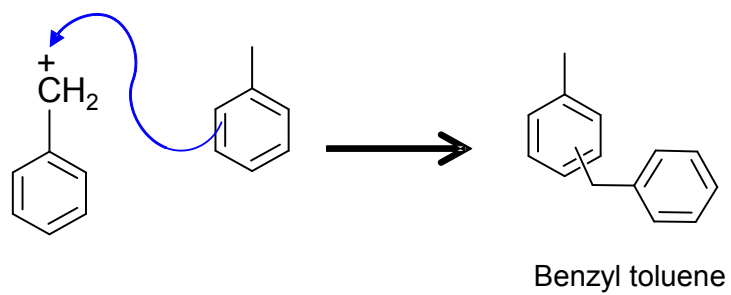

**Figure S4** Possible reaction mechanism of the formation of benzyl toluene by the reaction of toluene with dibenzyl ether in the presence of protonic acid catalyst.

## References

- [S1] M. Morais, E. F. Torres, L. M. P. M. Carmo, N. M. R. Pastura, W.A. Gonzalez, A. C. B. dos Santos, E. R. Lachter, *Catal. Today* 1996, **28**, 17-21.
- [S2] Y. Rao, M. Trudeau, D. Antonelli, *J. Am. Chem. Soc.* 2006, **128**, 13996-13997.
- [S3] T. Kitano, T. Shishido, K. Teramura, T. Tanaka, *J. Phys. Chem. C* 2012, **116**, 11615-11625.
- [S4] T. Murayama, J. L. Chen, J. Hirata, K. Matsumoto, W. Ueda, *Catal. Sci. Technol.* 2014, **4**, 4250-4257.
- [S5] A. Takagaki, C. Tagusagawa, S. Hayashi, M. Hara, K. Domen, *Energy Environ. Sci.* 2010, **3**, 82-93.
